# Supplementary material
Source: PubMed Central journal article supplement (PMC2568056)
Supplement: supp_7_10_1847__3.pdf [file supp_7_10_1847__3.pdf]

## Supporting information

Table S1. Primers used in this study

| Primers   | Sequence (5' to 3')                            | Comment                      |
|-----------|------------------------------------------------|------------------------------|
| JOHE9212  | GGCCCTAGGTAAGTCTACTCT                          | <i>SXI1α</i> Deletion        |
| JOHE9213  | AGCTCACATCCTCGCAGCTATTTGATCAGCTGCTTATTGTTT     | <i>SXI1α</i> Deletion        |
| JOHE9214  | CCGTGTTAATACAGATAAACCGCAAACGCACTCATGATGGTTCGAG | <i>SXI1α</i> Deletion        |
| JOHE9215  | TTCGAAACCGGAAGACCTCAG                          | <i>SXI1α</i> Deletion        |
| JOHE10020 | ATGTGCGGATCCGAGGAATGA                          | <i>SXI2a</i> Deletion        |
| JOHE10021 | AGCTCACATCCTCGCAGCGGTGACGATAGAACTGTTGATAGA     | <i>SXI2a</i> Deletion        |
| JOHE10022 | CCGTGTTAATACAGATAAACCGACCAAACCTTCTTTGCCCTCCAG  | <i>SXI2a</i> Deletion        |
| JOHE10023 | GCCTTGCTCGCACTTTAAGTC                          | <i>SXI2a</i> Deletion        |
| JOHE9052  | GACCGAGAAAACGCCAAAAAT                          | <i>SXI1α::URA5</i> screening |
| JOHE9624  | TTGGGTCAACTCTAATAAGGTGGT                       | <i>SXI1α::URA5</i> screening |
| JOHE16835 | TTGGGTCAACTCTAATAAGGT                          | <i>SXI2a::URA5</i> screening |
| JOHE16836 | TCTATGGCGAACGTGCTCATT                          | <i>SXI2a::URA5</i> screening |
| Da3       | GCAATAGCATATACCATCCCG                          | Mitochondrial DNA            |
| Da20      | GACACTACACAAGATGCCTC                           | Mitochondrial DNA            |

## Supplementary Figures

**Fig. S1.** Serotype A (*sxi1α* + *SXI2a*) x “a” or (*sxi1α* + *SXI2a*) x **a** crosses can produce basidiospore chains. Serotype A strains of the indicated genotypes were crossed on MS mating medium in the dark at 25°C. After 1 week incubation, the photos of the mating colonies were taken at 100x magnification. The arrows indicate the spore chains produced at the edge of the mating colony.

**Fig. S2.** Evolution of the tetrapolar mating system. A proposed model depicting how a tetrapolar system may have evolved from an ancestral bipolar mating system. Arrows between or within the alleles indicate compatible recognition.
