# Supplementary material
Source: PubMed Central journal article supplement (PMC2568056)

Fig. S1

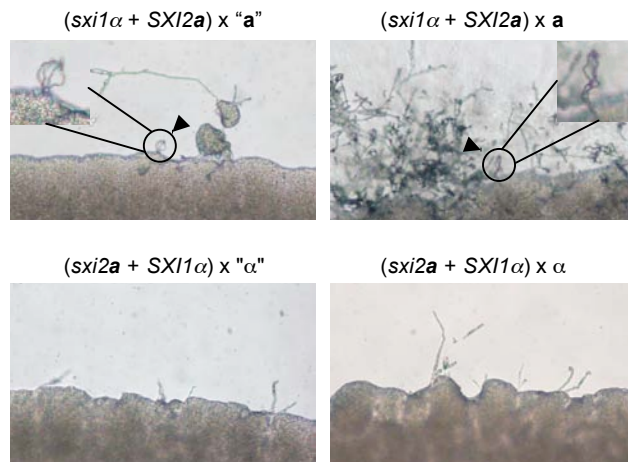

Supplement: supp_7_10_1847__1.pdf [file supp_7_10_1847__1.pdf]

Fig. S2

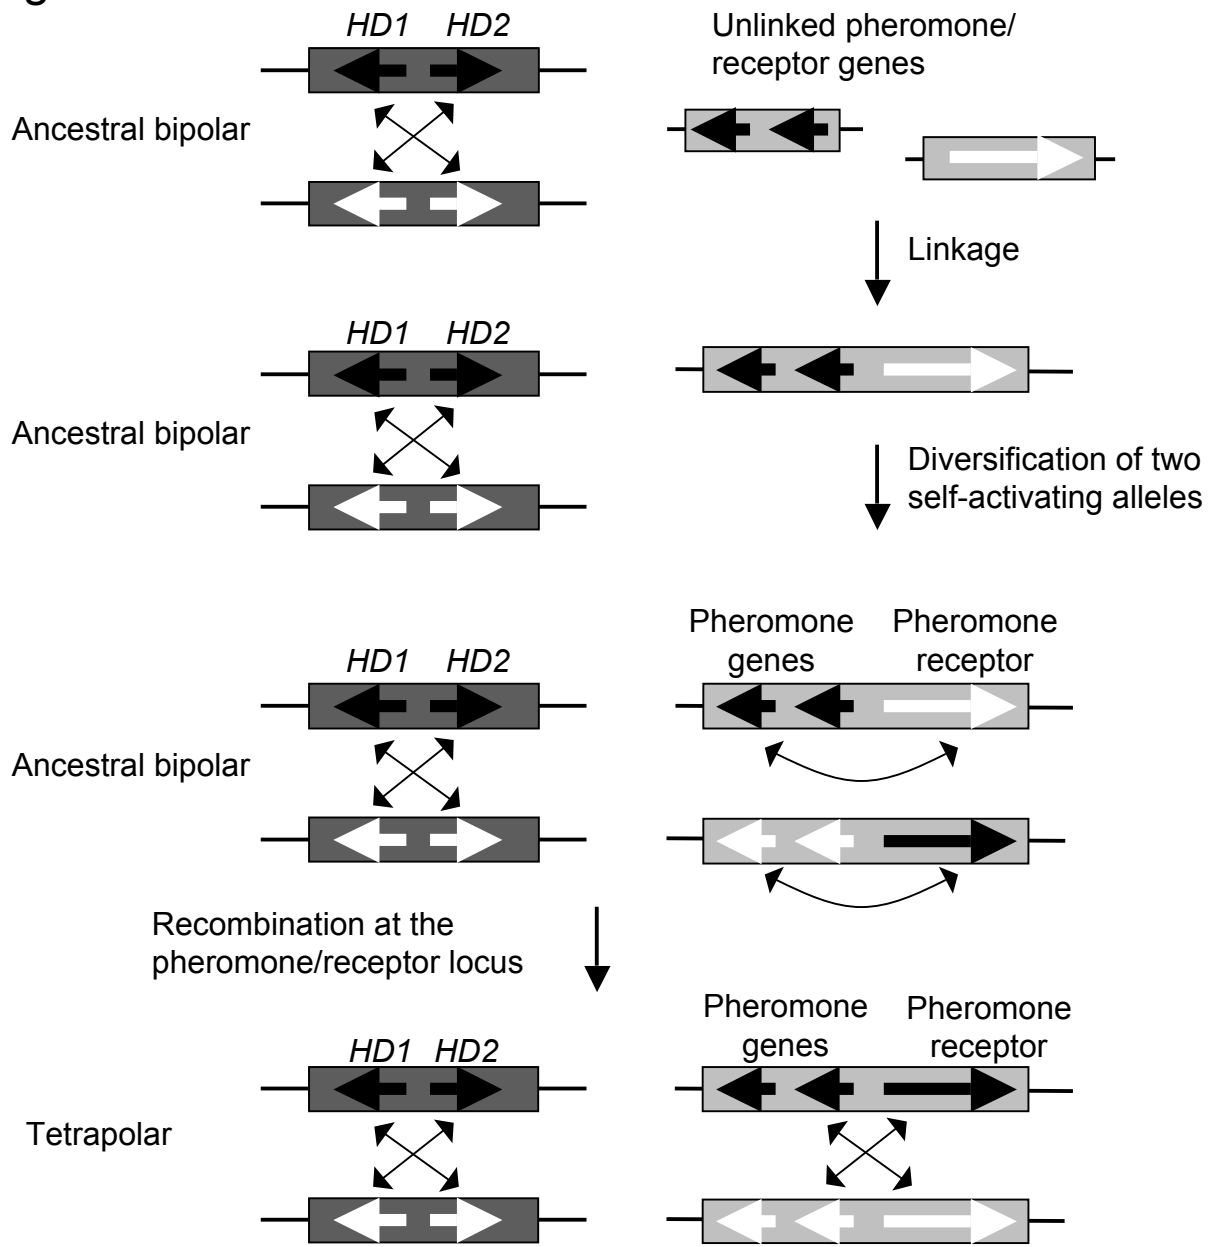

Supplement: supp_7_10_1847__2.pdf [file supp_7_10_1847__2.pdf]
